# Supplementary material for: Cooperative dihydrogen activation at a Na(i)2/Mg(i)2ensemble
Source: Royal Society of Chemistry journal article supplement (doi:10.1039/d3cc00710c), 2023-01-01
Supplement: d3cc00710c1.pdf [file d3cc00710c1.pdf]

## Experimental and Supplementary Information for

### Cooperative Dihydrogen Activation at a Na(I)<sub>2</sub>/Mg(I)<sub>2</sub> Ensemble

Han-Ying Liu, Samuel E. Neale, Michael S. Hill,\* Mary F. Mahon, Claire L. M<sup>c</sup>Mullin\* and Ben Morrison

*Department of Chemistry, University of Bath, Claverton Down, Bath, BA2 7AY, UK.*

## 1 Experimental and Supplementary Information

### 1.1. General information

Unless stated otherwise, all the experiments were conducted using standard Schlenk line and/or glovebox techniques under an inert atmosphere of argon. NMR spectra were recorded with an Agilent ProPulse spectrometer (<sup>1</sup>H at 500 MHz, <sup>13</sup>C at 126 MHz). The spectra are referenced relative to residual protio solvent resonances. Elemental analyses were performed at Elemental Microanalysis Ltd., Okehampton, Devon, UK. Solvents were dried by passage through a commercially available solvent purification system and stored under argon in ampoules over 4 Å molecular sieves. C<sub>6</sub>D<sub>6</sub> was purchased from Sigma-Aldrich, dried over a potassium mirror before distilling and storage over molecular sieves. [{SiN<sup>Dipp</sup>}MgNa]<sub>2</sub> (**6**),<sup>1</sup> was prepared according to reported procedures. All other chemicals were purchased from Sigma-Aldrich Merck and used without further purification.

#### *Synthesis of [{SiN<sup>Dipp</sup>}Mg(H)Na]<sub>2</sub>{SiN<sup>Dipp</sup>}Na<sub>2</sub>(H)Mg{SiN<sup>Dipp</sup>}] (**9**)*

In a J Young's tube, [{SiN<sup>Dipp</sup>}MgNa]<sub>2</sub> (**6**, 21.6 mg, 0.02 mmol) was dissolved in 0.4 mL of d<sub>6</sub>-benzene. The bright yellow solution was degassed by three freeze-pump-thaw cycles, before being charged with 2 atm. of hydrogen gas. The reaction mixture was observed to develop into a colourless solution with black precipitates after being kept at 40 °C for 3 days. The reaction mixture was then filtered and removal of all volatiles of the filtrate *under vacuo* afforded **6** as a colorless powder. Yield 17.9 mg, 78 %. The reaction was also carried out in the same procedure with <sup>2</sup>H<sub>2</sub>, and the resulting powder was dissolved in C<sub>6</sub>H<sub>6</sub> to record a <sup>2</sup>H NMR spectrum. Anal Calc'd for C<sub>96</sub>H<sub>166</sub>Mg<sub>2</sub>N<sub>6</sub>Na<sub>4</sub>Si<sub>6</sub> (**6**, 1713. 51): C, 67.29; H, 9.77; N, 4.90 %. Found: C, 66.82; H, 9.42; N, 4.82 %. Single crystals suitable for X-ray crystallography were obtained by slow evaporation of a hexane solution of **6** at room temperature. <sup>1</sup>H NMR (500 MHz, 298 K, Benzene-*d*<sub>6</sub>) δ 7.03 – 6.93 (m, 4H, *m*-C<sub>6</sub>H<sub>3</sub>), 6.90 (d, *J* = 7.5 Hz, 8H, *m*-C<sub>6</sub>H<sub>3</sub> on {SiN<sup>Dipp</sup>}Mg), 6.82 – 6.78 (m, 2H, *p*-C<sub>6</sub>H<sub>3</sub>), 6.74 (t, *J* = 7.5 Hz, 4H, *p*-C<sub>6</sub>H<sub>3</sub> on {SiN<sup>Dipp</sup>}Mg), 3.96 (sept, *J* = 7.0 Hz, 8H, CHMe<sub>2</sub> on {SiN<sup>Dipp</sup>}Mg), 3.90 (sept, *J* = 6.9 Hz, 4H, CHMe<sub>2</sub>), 1.28 (d, *J* = 7.0 Hz, 24H, CHMe<sub>2</sub> on {SiN<sup>Dipp</sup>}Mg), 1.23 (d, *J* = 6.9 Hz, 12H, CHMe<sub>2</sub>), 1.19 (d, *J* = 6.9 Hz, 12H, CHMe<sub>2</sub>), 1.17 (s, 8H, SiCH<sub>2</sub> on {SiN<sup>Dipp</sup>}Mg), 1.13 (s, 4H, SiCH<sub>2</sub>), 0.87 (d, *J* = 7.0 Hz, 24H, CHMe<sub>2</sub>

on  $\{\text{SiN}^{\text{Dipp}}\}\text{Mg}$ ), 0.25 (s, 36H,  $\text{SiMe}_2$ )\*overlapping peaks.  $^2\text{H}$  NMR (77 MHz, 298 K,  $\text{C}_6\text{H}_6$ )  $\delta$  4.16.  $^{13}\text{C}$  NMR (126 MHz, 298 K, Benzene- $d_6$ )  $\delta$  156.6 (*i*- $\text{C}_6\text{H}_3$ ), 152.1 (*i*- $\text{C}_6\text{H}_3$  on  $\{\text{SiN}^{\text{Dipp}}\}\text{Mg}$ ), 147.1 (*o*- $\text{C}_6\text{H}_3$ ), 146.0 (*o*- $\text{C}_6\text{H}_3$  on  $\{\text{SiN}^{\text{Dipp}}\}\text{Mg}$ ), 129.3 (*m*- $\text{C}_6\text{H}_3$ ), 123.1 (*p*- $\text{C}_6\text{H}_3$ ), 122.7 (*m*- $\text{C}_6\text{H}_3$  on  $\{\text{SiN}^{\text{Dipp}}\}\text{Mg}$ ), 119.9 (*p*- $\text{C}_6\text{H}_3$  on  $\{\text{SiN}^{\text{Dipp}}\}\text{Mg}$ ), 27.4 ( $\text{CHMe}_2$ ), 27.1 ( $\text{CHMe}_2$  on  $\{\text{SiN}^{\text{Dipp}}\}\text{Mg}$ ), 25.6 ( $\text{CHMe}_2$  on  $\{\text{SiN}^{\text{Dipp}}\}\text{Mg}$ ), 25.2 ( $\text{CHMe}_2$ ), 24.0 ( $\text{CHMe}_2$ ), 23.8 ( $\text{CHMe}_2$  on  $\{\text{SiN}^{\text{Dipp}}\}\text{Mg}$ ), 13.2 ( $\text{SiCH}_2$  on  $\{\text{SiN}^{\text{Dipp}}\}\text{Mg}$ ), 13.0 ( $\text{SiCH}_2$ ), 1.2 ( $\text{SiMe}_2$ )\*overlapping peaks.

**Figure S1.**  $^1\text{H}$  NMR (500 MHz, 298 K,  $\text{d}_6$ -benzene) spectrum of **9**. \*toluene  $^\dagger$ excess  $\text{H}_2$

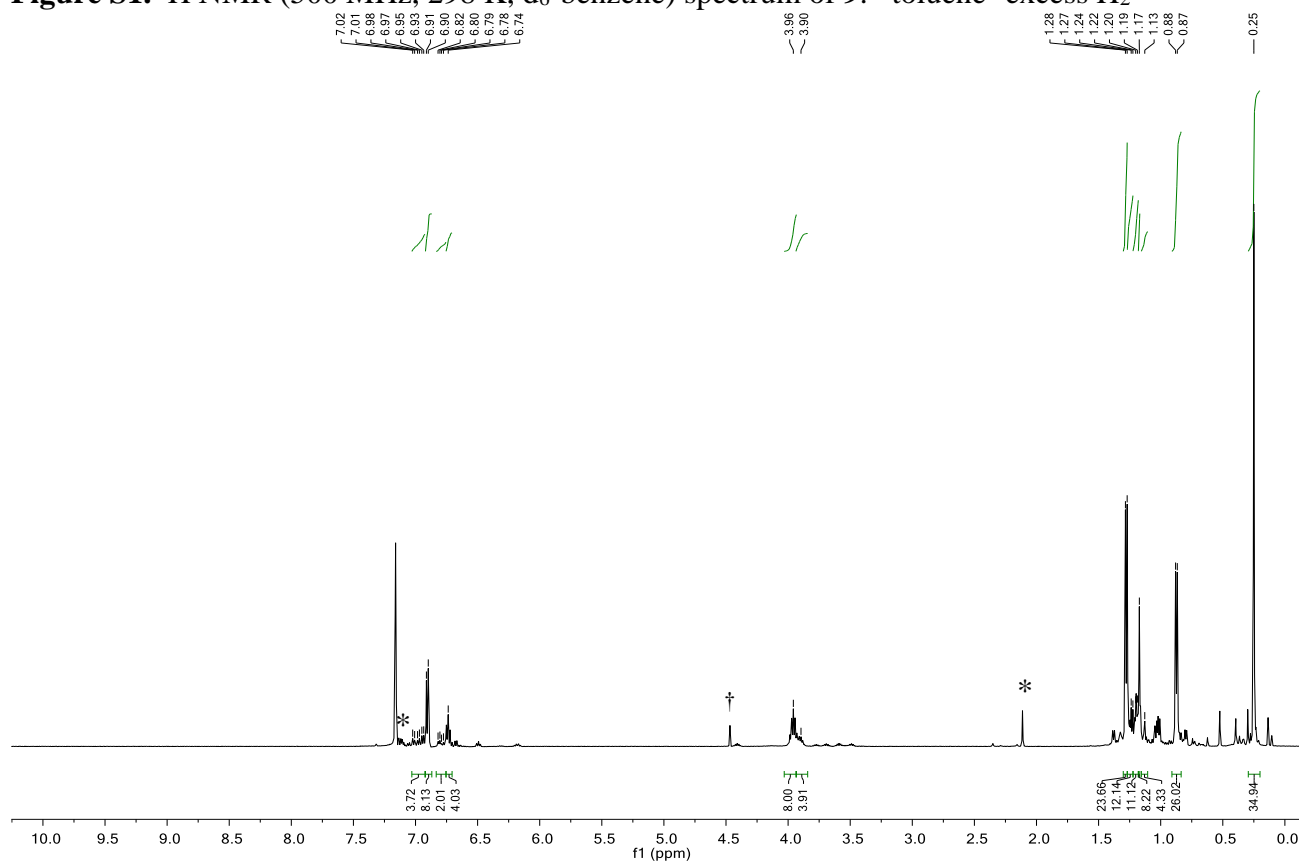

**Figure S2.** Expansion of the aliphatic region of the  $^1\text{H}$  NMR (500 MHz, 298 K,  $\text{d}_6$ -benzene) spectrum of **9**.

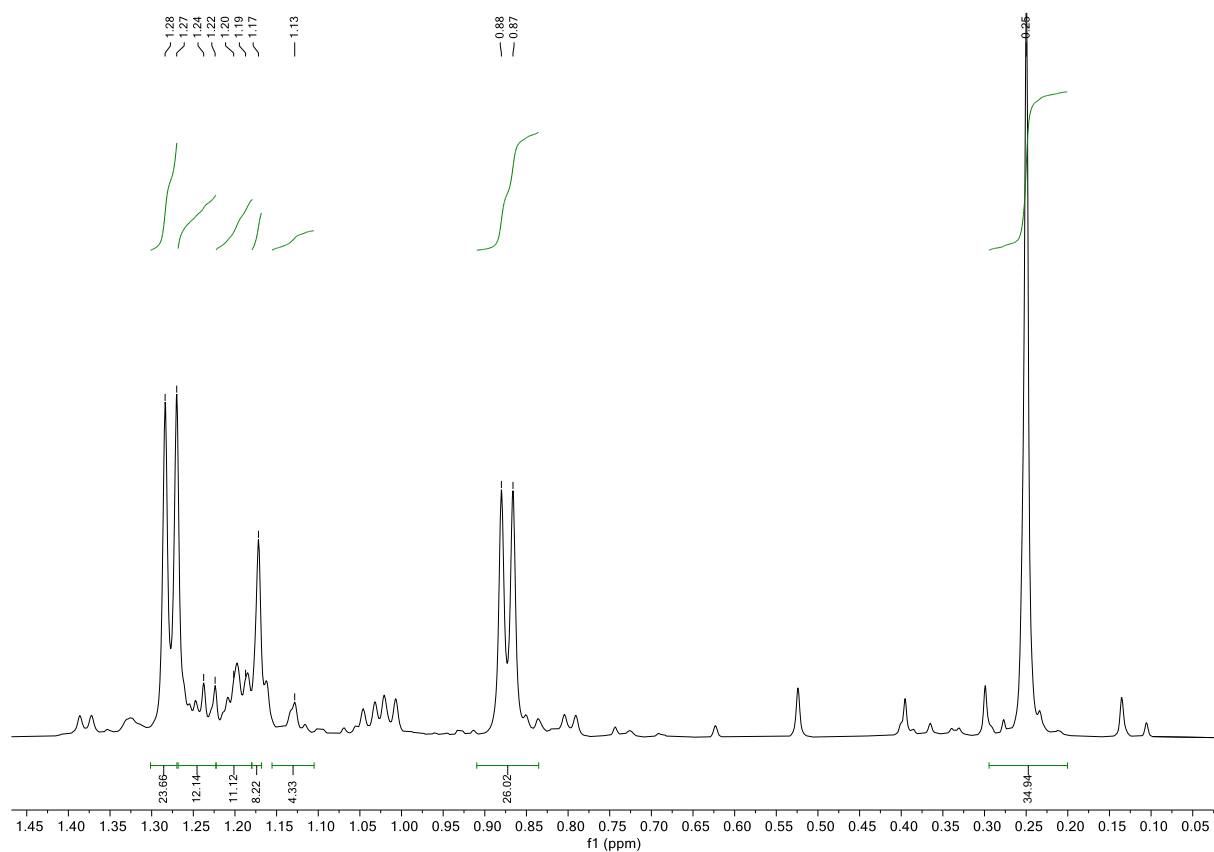

**Figure S3.**  $^2\text{H}$  NMR (77 MHz, 298 K, benzene) spectrum of **9**

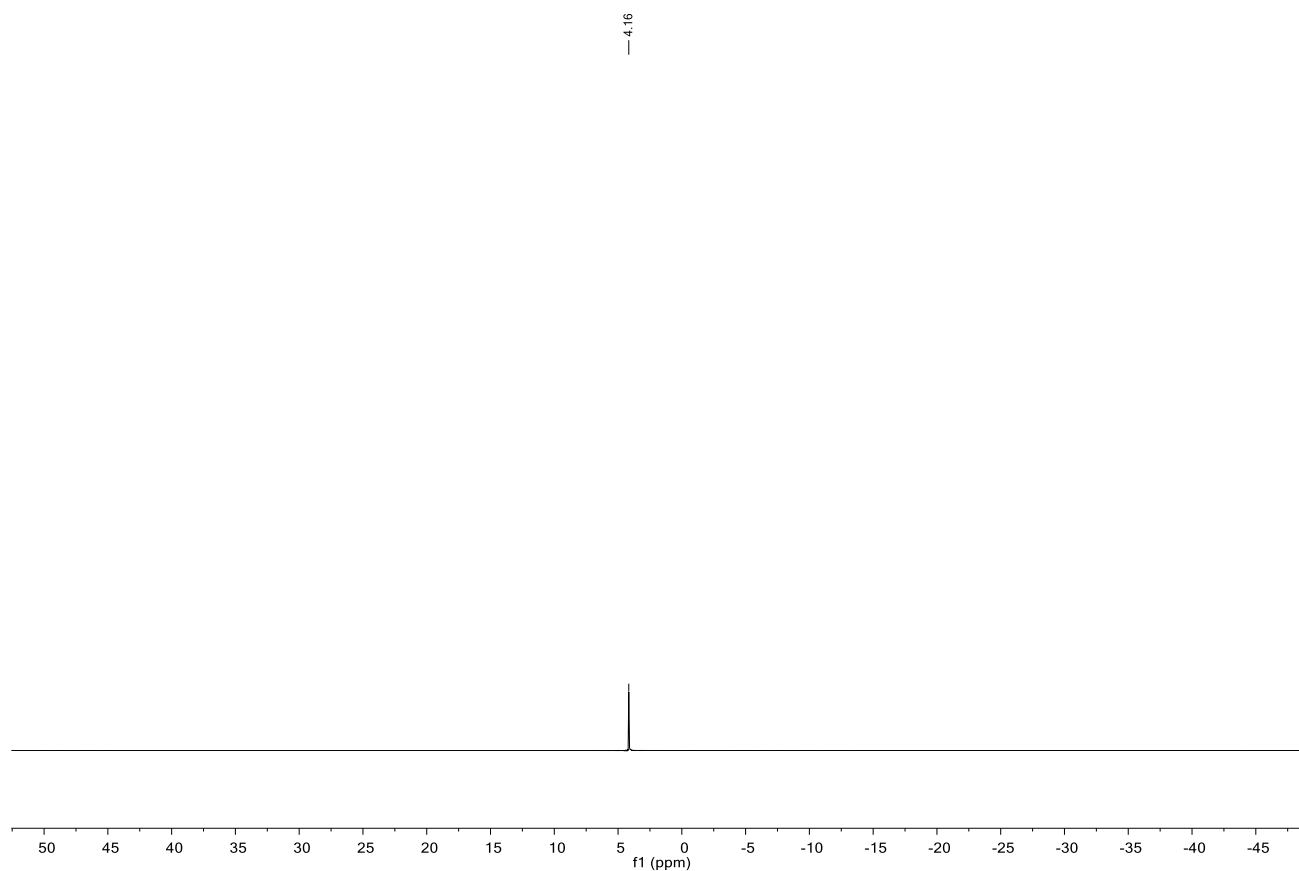

**Figure S4.**  $^{13}\text{C}\{^1\text{H}\}$  NMR (126 MHz, 298 K,  $d_6$ -benzene) spectrum of **9**.

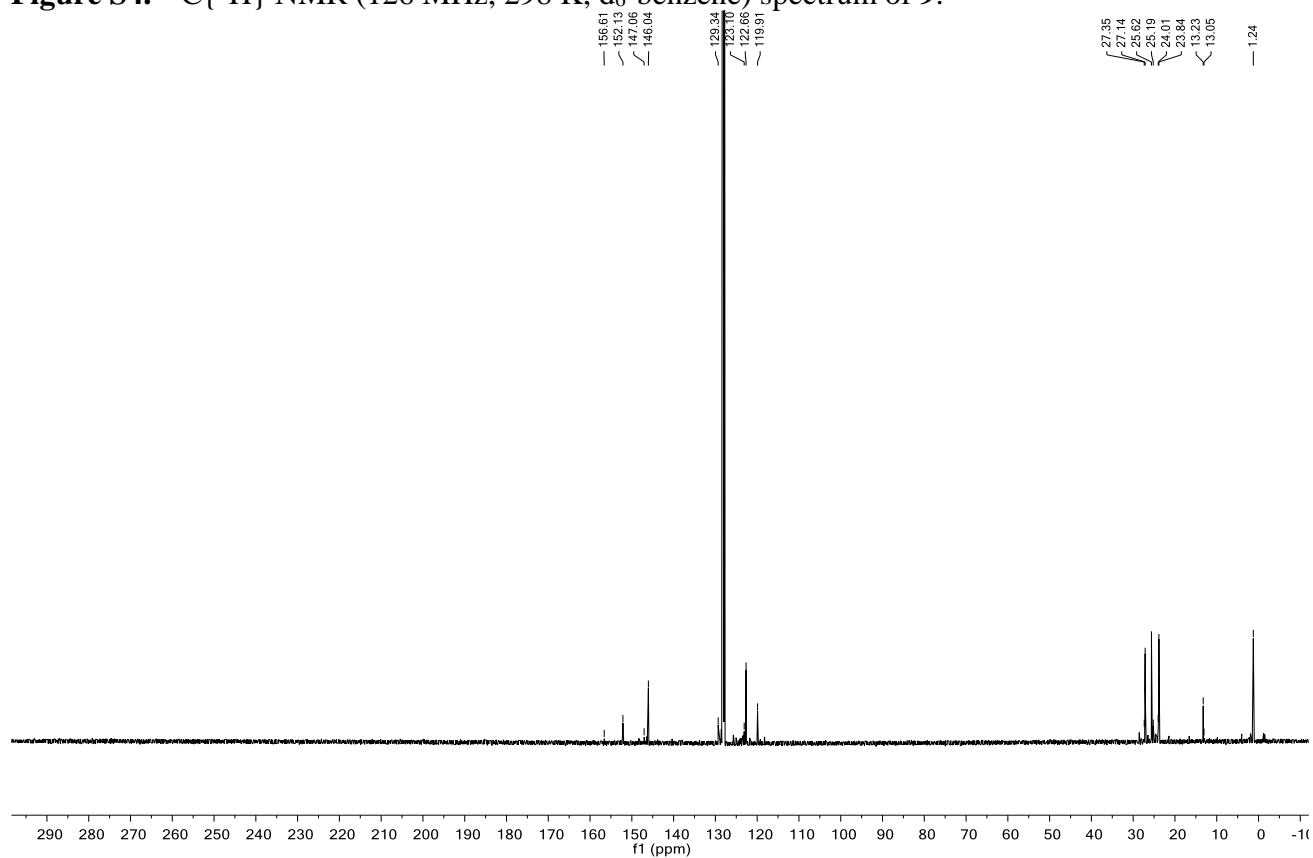

**Figure S5.** Expansion of the aliphatic region of the  $^{13}\text{C}\{^1\text{H}\}$  NMR (126 MHz, 298 K,  $\text{d}_6$ -benzene) spectrum of **9**.

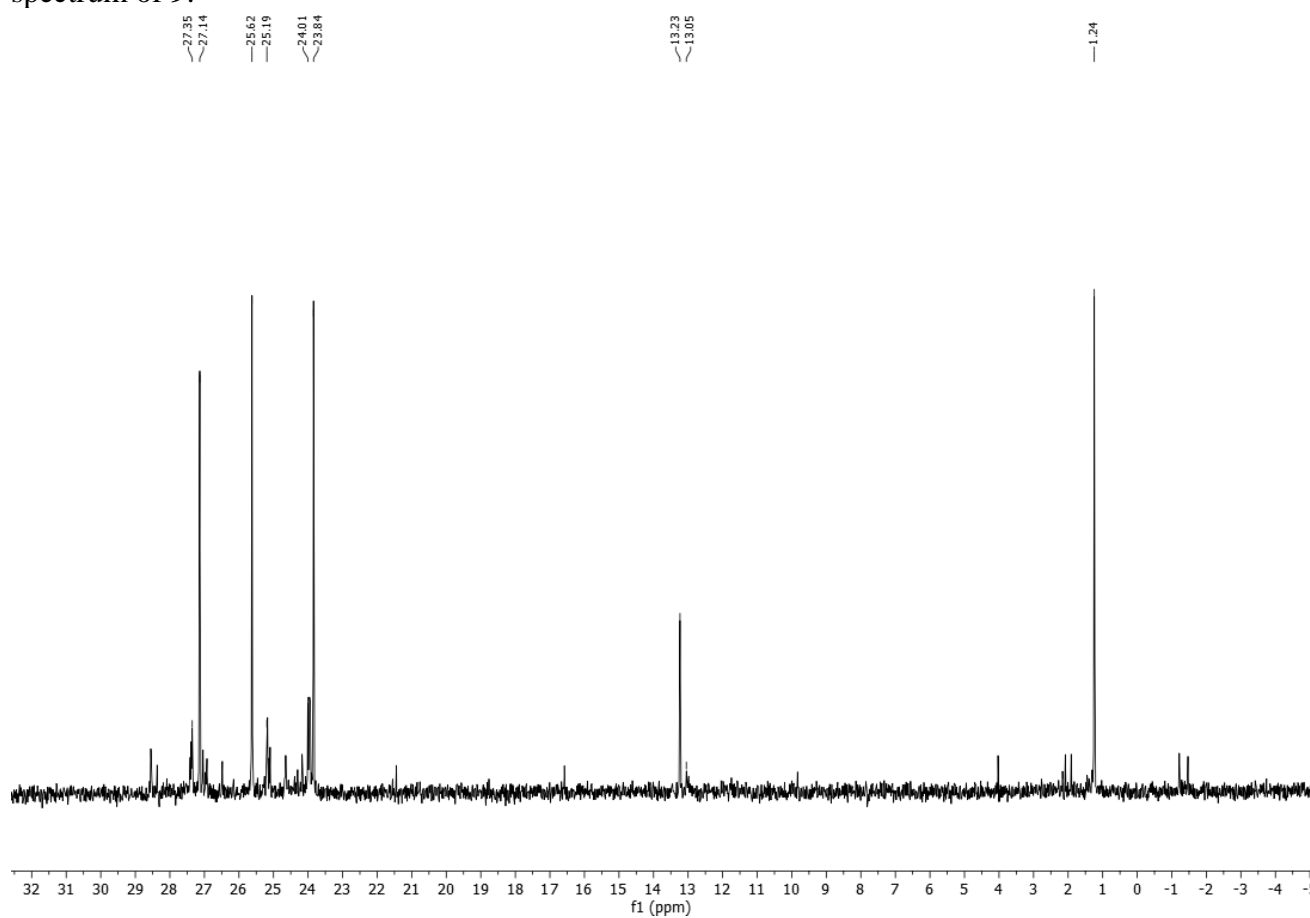

**Figure S6.**  $^1\text{H}$ - $^{13}\text{C}$  HSQC spectrum of **9**.

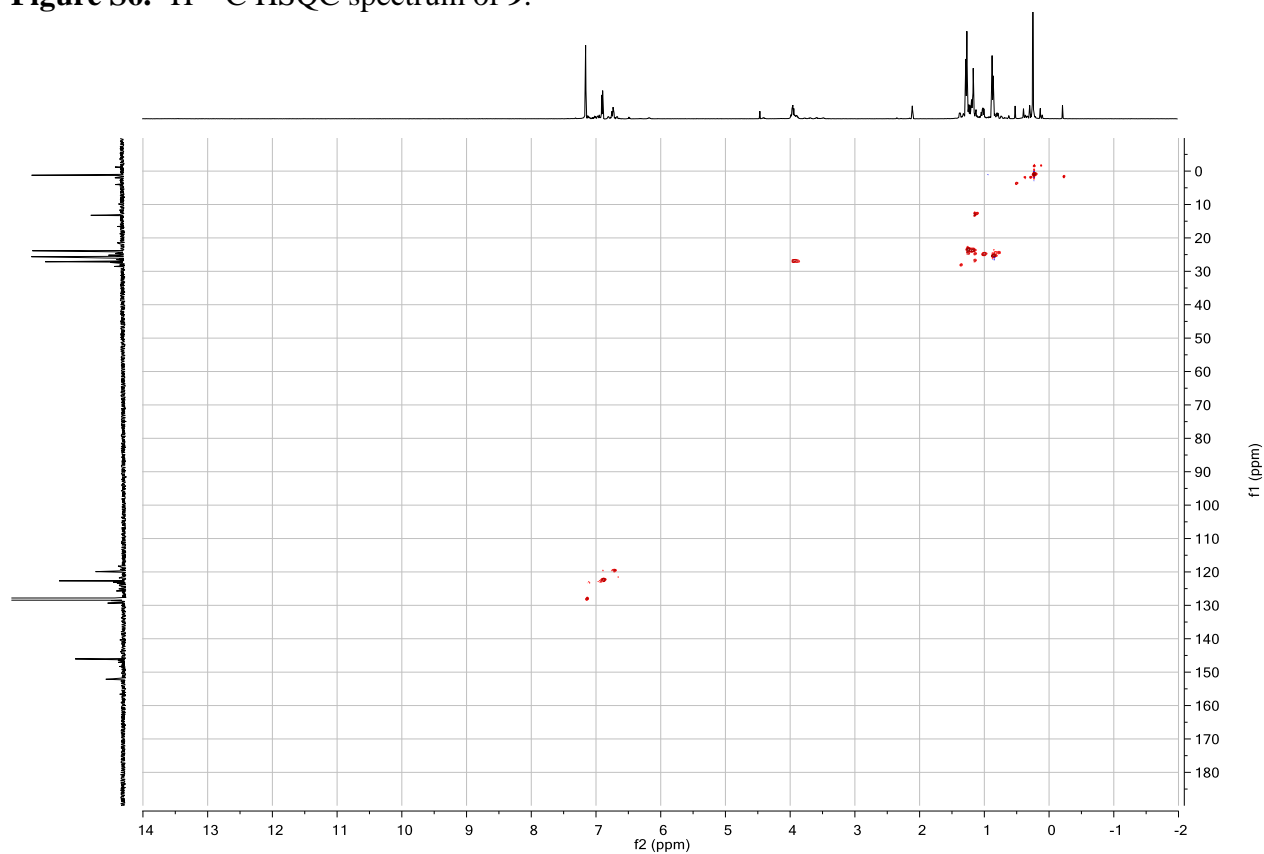

**Figure S7.**  $^1\text{H}$ - $^{13}\text{C}$  HMBC spectrum of **9**.

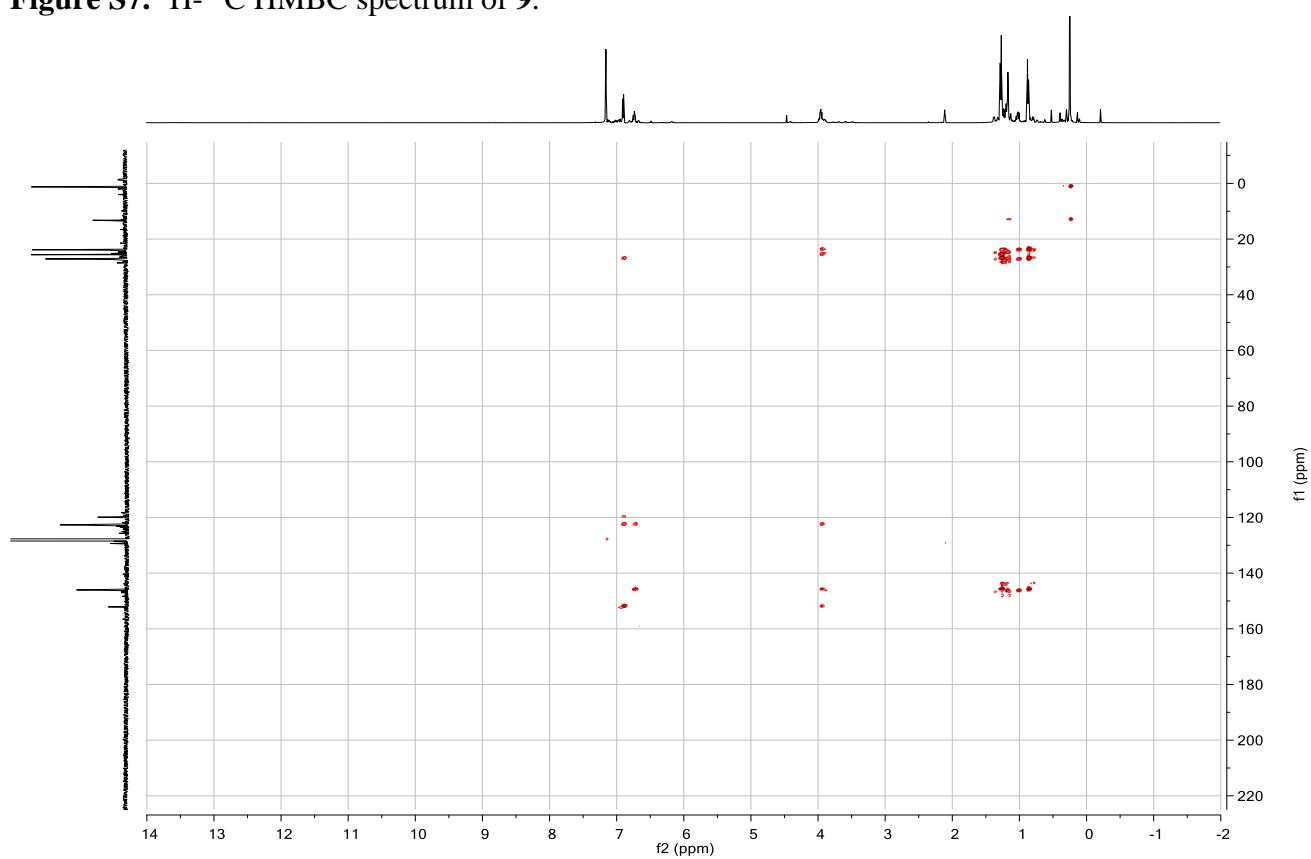

#### **1.4. ICP-OES Details (Conducted at Butterworth Lab.)**

The metallic solid deposited from a reaction of **6** and  $H_2$  performed as described above was isolated by careful decantation and washed with toluene (0.5 mL x2) and hexane (0.5 mL x2). The resultant powdery deposit was then collected, and all volatiles were removed under vacuum. The vial was then removed from the glovebox, 1mL of deionised water was then slowly added to the powder along with a few drops of  $HCl(aq.)$ . Bubbles were observed during this process. After all the metal had dissolved, the solution was further diluted deionised water to 5 mL in total volume. The sample was then kept under ambient conditions and shipped to Butterworth Lab. Ltd., Teddington, for ICPOES analysis.

## Certificate of Analysis

**Department of Chemistry**

University of Bath  
Bath  
UK  
BA2 7AY

**Job Ref:** 2206-0034  
**Report Ref:** RN-01783-22  
**Date Issued:** 30 June 2022  
**Order Ref:** 27505526

**For attention of H. Liu**

|                   |                                               |                     |              |
|-------------------|-----------------------------------------------|---------------------|--------------|
| Sample of:        | Acidified Aqueous Solution of Metallic Mirror | Date Received:      | 7 June 2022  |
| <b>BLL Ref:</b>   | <b>06-0122-22</b>                             | Analysis Completed: | 17 June 2022 |
| Analysis Started: | 15 June 2022                                  |                     |              |
| Sample Reference: | HYDL789                                       |                     |              |

| Test                      | Result | Units |
|---------------------------|--------|-------|
| Magnesium expressed as Mg | 110    | mg/L  |
|                           | 110    | mg/L  |
| Sodium expressed as Na    | <5     | mg/L  |
|                           | <5     | mg/L  |

Results relate to sample as received.

Sample analysed in accordance with in house method BLM 537G (revision 7).



**Andrew Milne**  
Team Leader - QC



**Craig McGonville**  
Analytical Operations Manager  
Issued for and on behalf of Butterworth Laboratories

Encl. Raw Data Pack

Butterworth Laboratories Limited  
54-56 Waldegrave Road  
Teddington, TW11 8NY, UK

Tel: +44 (0)20 8977 0750  
info@butterworth-labs.co.uk  
www.butterworth-labs.co.uk

[SS:141]

Page 1 of 1

Registered in England & Wales. Company Registration No. 1185121

**Directors**

Doris E Butterworth CChem, FRSC  
John M Gearey FCA  
David J Hawkins BSc (Hons), MRQA  
David A Riches BSc (Hons), CChem, MRSC  
Patrick D Stewart BA (Hons)



### 1.5. Single Crystal X-ray Diffraction Analysis

Data were collected for compound **9** on a Rigaku Xcalibur diffractometer (Mo K $\alpha$ ;  $\lambda$  = 0.71073 Å). The sample was maintained at 150(2) K during data collection. Using Olex2,<sup>2</sup> the structure were solved with the using ShelXT and refined with the ShelxL<sup>4</sup> refinement package using Least Squares minimization.

The asymmetric unit in **9** comprises half of a dimer (the remainder of which is generated *via* a crystallographic inversion centre) plus half of a molecule of hexane which is disordered in a 70:30 ratio. The latter fragments are also proximate to a centre of inversion, which serves to complete both moieties. With the inclusion of distance and ADP restraints, this region of the electron density map modelled well. The hydride at the centre of the metal triangle was located and refined with a riding  $U_{\text{iso}}$  value.

**Table S1:** Crystal data and structure refinement for compound **9**.

|                                                              |                                                                                  |
|--------------------------------------------------------------|----------------------------------------------------------------------------------|
| Empirical formula                                            | C <sub>48</sub> H <sub>83</sub> MgN <sub>3</sub> Na <sub>2</sub> Si <sub>3</sub> |
| Formula weight                                               | 856.73                                                                           |
| Crystal system                                               | triclinic                                                                        |
| Space group                                                  | <i>P</i> -1                                                                      |
| <i>a</i> /Å                                                  | 10.4759(3)                                                                       |
| <i>b</i> /Å                                                  | 12.0459(4)                                                                       |
| <i>c</i> /Å                                                  | 23.1083(8)                                                                       |
| $\alpha$ /°                                                  | 76.271(3)                                                                        |
| $\beta$ /°                                                   | 78.238(3)                                                                        |
| $\gamma$ /°                                                  | 69.189(3)                                                                        |
| Volume/Å <sup>3</sup>                                        | 2624.90(16)                                                                      |
| <i>Z</i>                                                     | 2                                                                                |
| $\rho_{\text{calc}}$ /cm <sup>3</sup>                        | 1.084                                                                            |
| $\mu$ /mm <sup>-1</sup>                                      | 0.152                                                                            |
| <i>F</i> (000)                                               | 936.0                                                                            |
| Crystal size/mm <sup>3</sup>                                 | 0.53 × 0.391 × 0.144                                                             |
| 2 $\Theta$ range for data collection/°                       | 5.922 to 60.634                                                                  |
| Index ranges                                                 | -14 ≤ <i>h</i> ≤ 14, -16 ≤ <i>k</i> ≤ 17, -32 ≤ <i>l</i> ≤ 32                    |
| Reflections collected                                        | 45674                                                                            |
| Independent reflections                                      | 13937 [ <i>R</i> <sub>int</sub> = 0.0357, <i>R</i> <sub>sigma</sub> = 0.0456]    |
| Data/restraints/parameters                                   | 13937/116/564                                                                    |
| Goodness-of-fit on <i>F</i> <sup>2</sup>                     | 1.027                                                                            |
| Final <i>R</i> indexes [ <i>I</i> ≥ 2 $\sigma$ ( <i>I</i> )] | <i>R</i> <sub>1</sub> = 0.0466, <i>wR</i> <sub>2</sub> = 0.1096                  |
| Final <i>R</i> indexes [all data]                            | <i>R</i> <sub>1</sub> = 0.0700, <i>wR</i> <sub>2</sub> = 0.1213                  |
| Largest diff. peak/hole / e Å <sup>-3</sup>                  | 0.60/-0.33                                                                       |

## 2.0 Computational Details

DFT calculations were run with Gaussian 16 (C.01)<sup>5</sup> using BP86.<sup>6-7</sup> The Na, Mg, and Si centres were described with the Stuttgart RECPs and associated basis sets,<sup>8</sup> and the 6-31G\*\* basis set was used for all other atoms (BS1).<sup>9-10</sup> A polarization function was also added to Si ( $\zeta_d = 0.284$ ). Initial BP86 optimizations were performed using the ‘grid = ultrafine’ option, with all stationary points being fully characterized via analytical frequency calculations as minima (all positive eigenvalues) or transition structures (one negative eigenvalue). Natural Bond Orbital analyses were carried out with NBO (version 7)<sup>11</sup> within Gaussian 16 (C.01) also at the BP86/6-311++G\*\* level. The energies of donor-acceptor interactions (i.e. “ $\Delta E^{(2)}$ ”) between the various molecular fragments (automatically designated during the NBO procedure itself) within **III** were also estimated with second-order perturbation theory analysis of the Fock matrix in the NBO basis, as is performed in NBO7. Key donor-acceptor NBO interactions between each designated fragment as part of the analyses, are provided in Table S2 and outlined in Figure S6.

## 2.1 NBO data

### Second Order Perturbation Theory Analysis of Donor Acceptor NBO interactions between molecular fragments

**Table S2.** Selected donor acceptor interaction energies,  $\Delta E^{(2)}$ , for **III**.

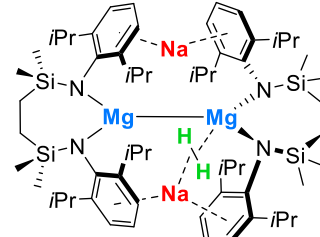

Left & right Mg (1) = Orange

Top & bottom Na (2&3) = Red

H<sub>2</sub> moiety (4) = Purple

| Donor NBO (Unit)                | Acceptor NBO (Unit)                | $\Delta E^{(2)}$ (kcal/mol) |  | Donor NBO (Unit)                | Acceptor NBO (Unit)    | $\Delta E^{(2)}$ (kcal/mol) |
|---------------------------------|------------------------------------|-----------------------------|--|---------------------------------|------------------------|-----------------------------|
| $\Omega_{\text{Mg5-Mg172}}$ (1) | $n^*_{\text{Na6}}$ (3)             | 16.7                        |  | $\Omega_{\text{Mg5-Mg172}}$ (1) | $n^*_{\text{Na7}}$ (2) | 30.1                        |
| $\Omega_{\text{Mg5-Mg172}}$ (1) | $\text{AB}_{\text{H173-H174}}$ (4) | 9.2                         |  | $\Omega_{\text{Mg5-Mg172}}$ (1) | $R^*_{\text{Na7}}$ (2) | 2.0                         |
| $\Omega_{\text{Mg5-Mg172}}$ (1) | $R^*_{\text{H173}}$ (4)            | 2.3                         |  | $\Omega_{\text{H173-H174}}$ (4) | $n^*_{\text{Na6}}$ (3) | 1.6                         |

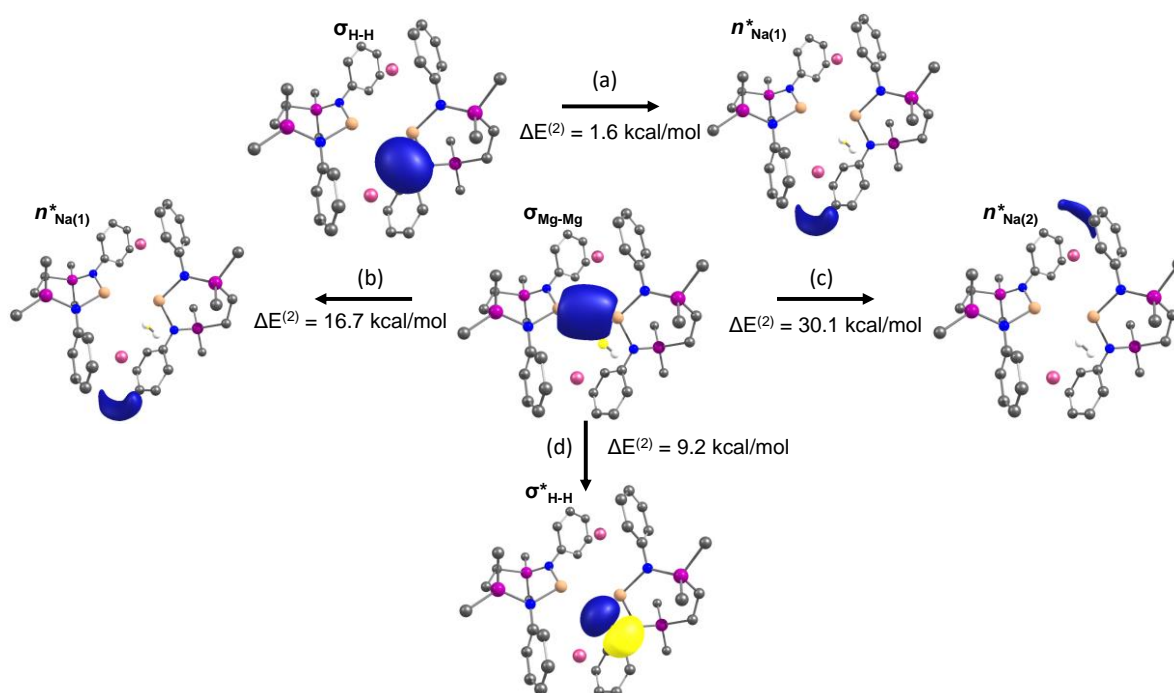

**Figure S8.** Overview of key NBO donor acceptor interactions between the H<sub>2</sub> fragment and the Mg<sub>2</sub>Na<sub>2</sub> tetrametallic core fragment (*a*, *d*) along with interactions within the Mg<sub>2</sub>Na<sub>2</sub> fragment itself (*b*, *c*).

## 2.2 Cartesian Coordinates and Computed Energies (in Hartrees)

### H<sub>2</sub>

SCF (BP86) Energy = -1.17646512696  
Enthalpy 0K = -1.164184  
Enthalpy 298K = -1.163240  
Free Energy 298K = -1.178052  
Lowest Frequency = 4354.5793 cm<sup>-1</sup>  
SCF (BP86-D3BJ) Energy = -1.17657513946  
SCF (C6H6) Energy = -1.17652524941  
SCF (BS2) Energy = -1.17751849719

H 0.00000 0.00000 0.37532  
H 0.00000 0.00000 -0.37532

### TS(I-II)

SCF (BP86) Energy = -2584.87178002  
Enthalpy 0K = -2583.331117  
Enthalpy 298K = -2583.330172  
Free Energy 298K = -2583.559461  
Lowest Frequency = -80.7041 cm<sup>-1</sup>  
Second Frequency = 14.5354 cm<sup>-1</sup>  
SCF (BP86-D3BJ) Energy = -2585.37776370  
SCF (C6H6) Energy = -2584.88633265  
SCF (BS2) Energy = -4450.66763207

Si -4.67452 -0.55866 1.60309  
Si -4.33679 1.61798 -1.66751  
Si 4.35527 -1.49471 -1.70324  
Si 4.74408 0.64482 1.58499  
Mg 1.75685 -0.17019 0.05293  
Na -0.40162 -3.46098 0.04585  
Na 0.41401 3.45253 0.10139  
N -3.12941 -1.17001 0.95808  
N -2.72646 1.78447 -0.91776  
N 3.14294 1.14823 0.97586  
N 2.77166 -1.75520 -0.93060  
C -2.85649 -2.54157 1.12806  
C 2.11649 -2.97362 -1.17516  
C -1.16026 3.16562 -2.29052  
C -3.20828 -3.52753 0.12037  
C -2.06283 3.00225 -1.16475  
C -2.20239 -3.04853 2.32047  
C 2.77108 2.47569 1.27067  
C 1.19998 -3.13515 -2.29190  
C 2.31523 -4.13584 -0.32589  
C 3.18819 3.59523 0.44504  
C -1.80202 -4.40060 2.39910  
H -1.28916 -4.74891 3.30363  
C -1.99833 -2.17271 3.55749  
H -2.52200 -1.22268 3.35556  
C 5.99176 0.11636 0.22664  
H 6.04605 0.92945 -0.52261  
H 6.97590 0.13911 0.74162  
C -2.24771 4.15949 -0.30787  
C -2.80888 -4.87512 0.26133  
H -3.08952 -5.59455 -0.51674  
C -0.48161 4.38792 -2.49035  
H 0.18289 4.48878 -3.35630  
C 5.81284 -1.24538 -0.47843  
H 5.77251 -2.06386 0.26645  
H 6.71446 -1.46285 -1.08996  
C -5.94795 -0.04308 0.25994  
H -6.00185 -0.84922 -0.49561  
H -6.92957 -0.06973 0.77821  
C 0.99035 -2.01762 -3.31400  
H 1.42554 -1.10519 -2.86898  
C 1.94060 2.79020 2.41938  
C -5.77488 1.32509 -0.43318  
H -5.72991 2.13408 0.32200  
H -6.68160 1.55071 -1.03453  
C 0.54634 -4.36799 -2.50857  
H -0.11968 -4.46980 -3.37319  
C -2.08109 -5.32132 1.37631  
H -1.77180 -6.36789 1.46338  
C 2.76004 4.90699 0.74517

|   |          |          |          |
|---|----------|----------|----------|
| H | 3.09449  | 5.73195  | 0.10470  |
| C | 3.33155  | -4.12312 | 0.81527  |
| H | 3.63930  | -3.06825 | 0.93320  |
| C | -1.54056 | 5.35700  | -0.55327 |
| H | -1.70768 | 6.21568  | 0.10824  |
| C | 1.93761  | 5.18669  | 1.84750  |
| H | 1.62609  | 6.21253  | 2.06922  |
| C | 1.63053  | -5.34340 | -0.58824 |
| H | 1.81732  | -6.20901 | 0.05841  |
| C | -3.23321 | 4.13757  | 0.85997  |
| H | -3.72453 | 3.15092  | 0.82326  |
| C | -0.98613 | 2.06691  | -3.34033 |
| H | -1.47598 | 1.16584  | -2.93067 |
| C | 4.10662  | 3.40575  | -0.76286 |
| H | 4.38696  | 2.33923  | -0.77151 |
| C | 1.54570  | 4.12194  | 2.67409  |
| H | 0.93191  | 4.33328  | 3.55731  |
| C | 0.74403  | -5.47508 | -1.66807 |
| H | 0.23347  | -6.42381 | -1.86191 |
| C | 4.65878  | -0.80212 | 2.83857  |
| H | 3.98263  | -0.57804 | 3.68035  |
| H | 5.66887  | -0.97379 | 3.25279  |
| H | 4.33321  | -1.75166 | 2.38338  |
| C | -0.65169 | 5.48577  | -1.63210 |
| H | -0.12094 | 6.42610  | -1.81276 |
| C | -4.37231 | 0.95193  | 2.73478  |
| H | -3.92989 | 0.63915  | 3.69612  |
| H | -5.31611 | 1.48272  | 2.95410  |
| H | -3.68446 | 1.67416  | 2.26685  |
| C | -5.56405 | -1.87328 | 2.67657  |
| H | -6.61719 | -1.57776 | 2.82698  |
| H | -5.10048 | -1.95394 | 3.67308  |
| H | -5.55832 | -2.87897 | 2.22517  |
| C | 4.29242  | 0.03802  | -2.84400 |
| H | 3.65288  | -0.14916 | -3.72306 |
| H | 5.30144  | 0.30342  | -3.20832 |
| H | 3.88805  | 0.91572  | -2.31355 |
| C | -4.09758 | -3.15894 | -1.06511 |
| H | -4.12525 | -2.05628 | -1.09163 |
| C | 4.88559  | -2.99921 | -2.78078 |
| H | 4.07548  | -3.72936 | -2.93766 |
| H | 5.73337  | -3.53620 | -2.32132 |
| H | 5.22516  | -2.65368 | -3.77314 |
| C | -2.60765 | -2.81906 | 4.82412  |
| H | -3.64759 | -3.14480 | 4.66132  |
| H | -2.59806 | -2.09886 | 5.66101  |
| H | -2.02953 | -3.70300 | 5.14863  |
| C | 1.54733  | 1.71578  | 3.43482  |
| H | 1.79373  | 0.74479  | 2.96902  |
| C | -4.35327 | 0.20909  | -2.96343 |
| H | -3.81696 | 0.51639  | -3.87723 |
| H | -5.38748 | -0.05255 | -3.25129 |
| H | -3.86822 | -0.70625 | -2.58778 |
| C | -0.51606 | -1.83910 | 3.80694  |
| H | 0.09825  | -2.75569 | 3.87641  |
| H | -0.38888 | -1.28542 | 4.75370  |
| H | -0.12033 | -1.20950 | 2.99175  |
| C | 1.74444  | -2.32133 | -4.63120 |
| H | 2.82044  | -2.47984 | -4.46277 |
| H | 1.62787  | -1.48606 | -5.34489 |
| H | 1.34264  | -3.23132 | -5.11285 |
| C | 0.49040  | 1.73234  | -3.62439 |
| H | 1.04897  | 2.60472  | -4.00688 |
| H | 0.57072  | 0.94120  | -4.38915 |
| H | 0.99890  | 1.36631  | -2.71404 |
| C | -0.49448 | -1.75057 | -3.62354 |
| H | -0.98665 | -2.62501 | -4.08481 |
| H | -0.59894 | -0.91487 | -4.33561 |
| H | -1.05489 | -1.47907 | -2.71046 |
| C | -4.86112 | 3.21771  | -2.58601 |
| H | -5.31359 | 3.94725  | -1.89349 |
| H | -5.62551 | 2.96938  | -3.34366 |
| H | -4.02717 | 3.72284  | -3.09852 |
| C | 0.04607  | 1.72994  | 3.78166  |
| H | -0.27365 | 2.69507  | 4.21283  |
| H | -0.18536 | 0.95200  | 4.52768  |
| H | -0.57286 | 1.52770  | 2.88831  |

|    |          |          |          |
|----|----------|----------|----------|
| C  | 5.61717  | 2.07363  | 2.51843  |
| H  | 4.93932  | 2.64394  | 3.17359  |
| H  | 6.08370  | 2.79149  | 1.82438  |
| H  | 6.42346  | 1.65541  | 3.14645  |
| C  | 3.37940  | 3.71847  | -2.08848 |
| H  | 2.48211  | 3.09123  | -2.22045 |
| H  | 4.04056  | 3.53219  | -2.95307 |
| H  | 3.06276  | 4.77685  | -2.13099 |
| C  | 4.59280  | -4.93965 | 0.44584  |
| H  | 4.34322  | -6.00736 | 0.30823  |
| H  | 5.34891  | -4.87084 | 1.24788  |
| H  | 5.04870  | -4.57978 | -0.48902 |
| C  | -5.54161 | -3.66981 | -0.84191 |
| H  | -5.56240 | -4.77343 | -0.78613 |
| H  | -6.19430 | -3.36171 | -1.67800 |
| H  | -5.97737 | -3.27887 | 0.09104  |
| C  | 2.76063  | -4.63910 | 2.15467  |
| H  | 1.84549  | -4.10085 | 2.45599  |
| H  | 3.50261  | -4.51210 | 2.96226  |
| H  | 2.51572  | -5.71542 | 2.10562  |
| C  | -3.57612 | -3.67444 | -2.42164 |
| H  | -2.53772 | -3.35853 | -2.61119 |
| H  | -4.20051 | -3.28421 | -3.24406 |
| H  | -3.61007 | -4.77741 | -2.48313 |
| C  | -2.51982 | 4.27083  | 2.22296  |
| H  | -1.77833 | 3.46831  | 2.37912  |
| H  | -3.24532 | 4.21283  | 3.05328  |
| H  | -1.99313 | 5.23930  | 2.30696  |
| C  | -1.69256 | 2.44766  | -4.66403 |
| H  | -2.76329 | 2.65701  | -4.51459 |
| H  | -1.60444 | 1.62743  | -5.39884 |
| H  | -1.23449 | 3.34813  | -5.11205 |
| C  | 2.38338  | 1.85059  | 4.73056  |
| H  | 3.46435  | 1.79005  | 4.52844  |
| H  | 2.12397  | 1.04776  | 5.44348  |
| H  | 2.18809  | 2.81793  | 5.22784  |
| C  | 5.39571  | 4.25303  | -0.67226 |
| H  | 5.17532  | 5.33426  | -0.73206 |
| H  | 6.07225  | 4.00913  | -1.50999 |
| H  | 5.94034  | 4.07743  | 0.26876  |
| C  | -4.32065 | 5.22795  | 0.73127  |
| H  | -3.89127 | 6.24252  | 0.81849  |
| H  | -5.07065 | 5.11749  | 1.53400  |
| H  | -4.84359 | 5.17064  | -0.23663 |
| Mg | -1.73167 | 0.17402  | 0.04913  |
| H  | 2.26728  | -1.83469 | 1.92671  |
| H  | 1.56971  | -1.62233 | 2.11948  |

## II

SCF (BP86) Energy = -2584.87310933  
 Enthalpy 0K = -2583.331090  
 Enthalpy 298K = -2583.330146  
 Free Energy 298K = -2583.558413  
 Lowest Frequency = 23.2516 cm<sup>-1</sup>  
 Second Frequency = 26.0922 cm<sup>-1</sup>  
 SCF (BP86-D3BJ) Energy = -2585.38267179  
 SCF (C6H6) Energy = -2584.89308127  
 SCF (BS2) Energy = -4450.66800297

|    |          |          |          |
|----|----------|----------|----------|
| Si | -4.52323 | -1.16899 | 1.56604  |
| Si | -4.45678 | 0.95825  | -1.77364 |
| Si | 4.49381  | -0.86444 | -1.64278 |
| Si | 4.43578  | 1.16063  | 1.70698  |
| Mg | 1.66829  | 0.06866  | -0.01109 |
| Na | 0.16700  | -3.51922 | 0.05856  |
| Na | -0.08147 | 3.56036  | 0.03562  |
| N  | -2.88052 | -1.51624 | 0.96368  |
| N  | -2.91242 | 1.40760  | -1.00871 |
| N  | 2.83774  | 1.52830  | 1.00208  |
| N  | 2.95006  | -1.40030 | -0.92692 |
| C  | -2.34827 | -2.79114 | 1.22767  |
| C  | 2.50264  | -2.69787 | -1.23368 |
| C  | -1.54839 | 3.01070  | -2.35018 |
| C  | -2.57663 | -3.91573 | 0.33620  |
| C  | -2.44425 | 2.71189  | -1.24612 |
| C  | -1.54549 | -3.05545 | 2.41052  |
| C  | 2.30746  | 2.79909  | 1.30000  |

|   |          |          |          |
|---|----------|----------|----------|
| C | 1.57708  | -2.93984 | -2.32827 |
| C | 2.92089  | -3.86311 | -0.46785 |
| C | 2.64467  | 3.97758  | 0.52047  |
| C | -0.95978 | -4.32560 | 2.60654  |
| H | -0.36446 | -4.50072 | 3.51055  |
| C | -1.43275 | -2.02940 | 3.54156  |
| H | -1.82207 | -1.07820 | 3.13855  |
| C | 5.82803  | 0.84324  | 0.42400  |
| H | 5.83325  | 1.69850  | -0.27920 |
| H | 6.76472  | 0.95471  | 1.01086  |
| C | -2.82678 | 3.82782  | -0.39980 |
| C | -1.98135 | -5.17118 | 0.59206  |
| H | -2.18434 | -6.00310 | -0.09294 |
| C | -1.07194 | 4.32540  | -2.54825 |
| H | -0.41136 | 4.52662  | -3.39974 |
| C | 5.87132  | -0.48647 | -0.35949 |
| H | 5.92283  | -1.34174 | 0.34150  |
| H | 6.81547  | -0.53818 | -0.94213 |
| C | -5.83481 | -0.82777 | 0.20523  |
| H | -5.78699 | -1.66328 | -0.52015 |
| H | -6.80092 | -0.96906 | 0.73542  |
| C | 1.19914  | -1.82700 | -3.30648 |
| H | 1.50074  | -0.87734 | -2.82986 |
| C | 1.38446  | 2.99731  | 2.40437  |
| C | -5.85545 | 0.52394  | -0.53646 |
| H | -5.92479 | 1.35834  | 0.18837  |
| H | -6.78371 | 0.59720  | -1.14265 |
| C | 1.09181  | -4.24158 | -2.58193 |
| H | 0.41045  | -4.39783 | -3.42593 |
| C | -1.15585 | -5.38717 | 1.70748  |
| H | -0.70446 | -6.36763 | 1.89091  |
| C | 2.06586  | 5.23007  | 0.82159  |
| H | 2.34695  | 6.10098  | 0.21720  |
| C | 3.98976  | -3.77074 | 0.62458  |
| H | 4.13003  | -2.69476 | 0.83194  |
| C | -2.31893 | 5.12288  | -0.64379 |
| H | -2.63822 | 5.94753  | 0.00507  |
| C | 1.16221  | 5.39599  | 1.88226  |
| H | 0.73422  | 6.37813  | 2.10761  |
| C | 2.39814  | -5.14119 | -0.76654 |
| H | 2.73834  | -6.00151 | -0.17837 |
| C | -3.82541 | 3.65087  | 0.74275  |
| H | -4.06173 | 2.57362  | 0.77111  |
| C | -1.16681 | 1.94069  | -3.37345 |
| H | -1.49563 | 0.97717  | -2.94573 |
| C | 3.64577  | 3.91984  | -0.63316 |
| H | 4.01535  | 2.88176  | -0.66606 |
| C | 0.84059  | 4.27486  | 2.66332  |
| H | 0.16206  | 4.39893  | 3.51503  |
| C | 1.47922  | -5.34572 | -1.80688 |
| H | 1.09343  | -6.34671 | -2.02534 |
| C | 4.36386  | -0.35331 | 2.87355  |
| H | 3.69569  | -0.16250 | 3.73045  |
| H | 5.37118  | -0.57129 | 3.27212  |
| H | 4.00641  | -1.26099 | 2.36230  |
| C | -1.43944 | 5.38734  | -1.70590 |
| H | -1.06612 | 6.40065  | -1.88624 |
| C | -4.48682 | 0.33154  | 2.75029  |
| H | -3.98810 | 0.06409  | 3.69766  |
| H | -5.50935 | 0.67425  | 2.99111  |
| H | -3.94147 | 1.18378  | 2.31323  |
| C | -5.26100 | -2.65196 | 2.55086  |
| H | -6.17205 | -3.03257 | 2.05743  |
| H | -5.55575 | -2.33139 | 3.56540  |
| H | -4.56157 | -3.49722 | 2.65503  |
| C | 4.20350  | 0.70752  | -2.68901 |
| H | 3.62444  | 0.46659  | -3.59671 |
| H | 5.16141  | 1.15817  | -3.00629 |
| H | 3.64643  | 1.47225  | -2.12428 |
| C | -3.52612 | -3.80066 | -0.85530 |
| H | -3.78084 | -2.73017 | -0.93647 |
| C | 5.24336  | -2.18204 | -2.83140 |
| H | 4.62779  | -3.09234 | -2.91360 |
| H | 6.25141  | -2.48733 | -2.50161 |
| H | 5.35270  | -1.75851 | -3.84512 |
| C | -2.32480 | -2.45506 | 4.73465  |
| H | -3.36889 | -2.61960 | 4.42943  |



|    |          |          |          |
|----|----------|----------|----------|
| H  | -2.31404 | -1.67803 | 5.51977  |
| H  | -1.95559 | -3.39361 | 5.18659  |
| C  | 1.03893  | 1.86249  | 3.36910  |
| H  | 1.39420  | 0.93173  | 2.89057  |
| C  | -4.21307 | -0.52869 | -2.95173 |
| H  | -3.64446 | -0.22726 | -3.84791 |
| H  | -5.18578 | -0.93163 | -3.28718 |
| H  | -3.66069 | -1.35051 | -2.46718 |
| C  | 0.00572  | -1.79544 | 4.04408  |
| H  | 0.51051  | -2.73558 | 4.32968  |
| H  | -0.00136 | -1.15454 | 4.94290  |
| H  | 0.62368  | -1.28670 | 3.28671  |
| C  | 1.99124  | -1.97669 | -4.62813 |
| H  | 3.07801  | -1.99398 | -4.45466 |
| H  | 1.76497  | -1.13969 | -5.31294 |
| H  | 1.71908  | -2.91510 | -5.14456 |
| C  | 0.34956  | 1.86577  | -3.63309 |
| H  | 0.75088  | 2.80830  | -4.04619 |
| H  | 0.58045  | 1.07143  | -4.36352 |
| H  | 0.90224  | 1.63195  | -2.70505 |
| C  | -0.30784 | -1.75932 | -3.61314 |
| H  | -0.67912 | -2.67940 | -4.09838 |
| H  | -0.52467 | -0.92590 | -4.30245 |
| H  | -0.89832 | -1.59007 | -2.69454 |
| C  | -5.19189 | 2.39305  | -2.81825 |
| H  | -5.92396 | 2.97666  | -2.23453 |
| H  | -5.72967 | 1.97848  | -3.68934 |
| H  | -4.43220 | 3.09706  | -3.19330 |
| C  | -0.47353 | 1.73323  | 3.63071  |
| H  | -0.89628 | 2.64074  | 4.09700  |
| H  | -0.67836 | 0.89530  | 4.31658  |
| H  | -1.02649 | 1.53695  | 2.69407  |
| C  | 5.09524  | 2.62158  | 2.75967  |
| H  | 4.30924  | 3.13113  | 3.33943  |
| H  | 5.58768  | 3.38354  | 2.13302  |
| H  | 5.85180  | 2.24531  | 3.47080  |
| C  | 2.98129  | 4.23878  | -1.99042 |
| H  | 2.14424  | 3.55441  | -2.20941 |
| H  | 3.70882  | 4.14190  | -2.81526 |
| H  | 2.58875  | 5.27209  | -2.01137 |
| C  | 5.34232  | -4.33390 | 0.12417  |
| H  | 5.25559  | -5.41156 | -0.10450 |
| H  | 6.12043  | -4.21516 | 0.89891  |
| H  | 5.68592  | -3.82492 | -0.78833 |
| C  | -4.83303 | -4.58904 | -0.60384 |
| H  | -4.63098 | -5.67252 | -0.52024 |
| H  | -5.53894 | -4.44325 | -1.44061 |
| H  | -5.33022 | -4.26925 | 0.32468  |
| C  | 3.60537  | -4.48635 | 1.93939  |
| H  | 2.63227  | -4.15013 | 2.33447  |
| H  | 4.36657  | -4.28882 | 2.71386  |
| H  | 3.55522  | -5.58228 | 1.80833  |
| C  | -2.89471 | -4.25700 | -2.18682 |
| H  | -1.96329 | -3.71112 | -2.41017 |
| H  | -3.59282 | -4.07931 | -3.02340 |
| H  | -2.65984 | -5.33703 | -2.17986 |
| C  | -3.24131 | 4.05875  | 2.11221  |
| H  | -2.32425 | 3.49488  | 2.35310  |
| H  | -3.97018 | 3.86345  | 2.91825  |
| H  | -2.99418 | 5.13571  | 2.14404  |
| C  | -1.91169 | 2.15749  | -4.71273 |
| H  | -3.00457 | 2.16196  | -4.57955 |
| H  | -1.65854 | 1.35604  | -5.42991 |
| H  | -1.62535 | 3.12045  | -5.17337 |
| C  | 1.78668  | 2.02900  | 4.71379  |
| H  | 2.87831  | 2.06815  | 4.57452  |
| H  | 1.55909  | 1.18539  | 5.38954  |
| H  | 1.47927  | 2.96021  | 5.22339  |
| C  | 4.85291  | 4.86019  | -0.41589 |
| H  | 4.54683  | 5.92197  | -0.42856 |
| H  | 5.59581  | 4.72173  | -1.22093 |
| H  | 5.35288  | 4.67047  | 0.54695  |
| C  | -5.13592 | 4.42823  | 0.48226  |
| H  | -4.95843 | 5.51904  | 0.46769  |
| H  | -5.87240 | 4.22104  | 1.27856  |
| H  | -5.58734 | 4.15167  | -0.48331 |
| Mg | -1.69680 | -0.02211 | -0.00925 |

|   |         |          |         |
|---|---------|----------|---------|
| H | 2.13084 | -2.05404 | 1.28138 |
| H | 1.63957 | -2.08404 | 1.85657 |

# **TS(II-III)**

SCF (BP86) Energy = -2584.87294852  
 Enthalpy 0K = -2583.332091  
 Enthalpy 298K = -2583.331147  
 Free Energy 298K = -2583.558890  
 Lowest Frequency = -58.5131 cm<sup>-1</sup>  
 Second Frequency = 22.9393 cm<sup>-1</sup>  
 SCF (BP86-D3BJ) Energy = -2585.38264686  
 SCF (C6H6) Energy = -2584.89285512  
 SCF (BS2) Energy = -4450.66814089

|    |          |          |          |
|----|----------|----------|----------|
| Si | -4.55067 | -1.10828 | 1.54632  |
| Si | -4.42818 | 1.01948  | -1.79659 |
| Si | 4.48735  | -0.92261 | -1.66481 |
| Si | 4.44368  | 1.07133  | 1.71694  |
| Mg | 1.67465  | 0.04481  | -0.02023 |
| Na | 0.08592  | -3.54952 | 0.01606  |
| Na | -0.03194 | 3.54651  | 0.04423  |
| N  | -2.90006 | -1.47137 | 0.97445  |
| N  | -2.88333 | 1.44555  | -1.02042 |
| N  | 2.85704  | 1.47711  | 1.01032  |
| N  | 2.92917  | -1.42056 | -0.95994 |
| C  | -2.38280 | -2.75078 | 1.24633  |
| C  | 2.45591  | -2.71050 | -1.24915 |
| C  | -1.48989 | 3.03359  | -2.35005 |
| C  | -2.63542 | -3.88078 | 0.36827  |
| C  | -2.39545 | 2.74368  | -1.25160 |
| C  | -1.56973 | -3.01319 | 2.42440  |
| C  | 2.34528  | 2.75510  | 1.30662  |
| C  | 1.53575  | -2.95026 | -2.34905 |
| C  | 2.84334  | -3.87300 | -0.46345 |
| C  | 2.69781  | 3.92604  | 0.52348  |
| C  | -1.00669 | -4.29159 | 2.63012  |
| H  | -0.40294 | -4.46691 | 3.52782  |
| C  | -1.43238 | -1.97034 | 3.53804  |
| H  | -1.69905 | -0.99718 | 3.08877  |
| C  | 5.83458  | 0.74400  | 0.43511  |
| H  | 5.85616  | 1.61171  | -0.25261 |
| H  | 6.77010  | 0.83147  | 1.02814  |
| C  | -2.76619 | 3.86159  | -0.40289 |
| C  | -2.06352 | -5.14487 | 0.63662  |
| H  | -2.28797 | -5.98160 | -0.03595 |
| C  | -0.99594 | 4.34277  | -2.54204 |
| H  | -0.32869 | 4.53805  | -3.38967 |
| C  | 5.86288  | -0.57190 | -0.37132 |
| H  | 5.90373  | -1.43916 | 0.31568  |
| H  | 6.80824  | -0.62487 | -0.95215 |
| C  | -5.84147 | -0.74562 | 0.17052  |
| H  | -5.79971 | -1.58067 | -0.55585 |
| H  | -6.81304 | -0.87618 | 0.69363  |
| C  | 1.18060  | -1.83895 | -3.33693 |
| H  | 1.49761  | -0.89200 | -2.86501 |
| C  | 1.42789  | 2.96790  | 2.41260  |
| C  | -5.84101 | 0.60717  | -0.56883 |
| H  | -5.90274 | 1.44151  | 0.15668  |
| H  | -6.76488 | 0.69346  | -1.17995 |
| C  | 1.03896  | -4.24856 | -2.59847 |
| H  | 0.36581  | -4.40363 | -3.44938 |
| C  | -1.23307 | -5.36138 | 1.74764  |
| H  | -0.79911 | -6.34784 | 1.94088  |
| C  | 2.13804  | 5.18761  | 0.82293  |
| H  | 2.43159  | 6.05336  | 0.21703  |
| C  | 3.89308  | -3.77680 | 0.64584  |
| H  | 4.05044  | -2.69784 | 0.82563  |
| C  | -2.24060 | 5.15070  | -0.64045 |
| H  | -2.55164 | 5.97730  | 0.00994  |
| C  | 1.23821  | 5.36810  | 1.88456  |
| H  | 0.82431  | 6.35661  | 2.10840  |
| C  | 2.31137  | -5.14830 | -0.75816 |
| H  | 2.63375  | -6.00716 | -0.15772 |
| C  | -3.77108 | 3.69271  | 0.73512  |
| H  | -4.01903 | 2.61797  | 0.75897  |
| C  | -1.11447 | 1.96080  | -3.37264 |
| H  | -1.45285 | 0.99999  | -2.94626 |

|   |          |          |          |
|---|----------|----------|----------|
| C | 3.70504  | 3.84986  | -0.62304 |
| H | 4.02556  | 2.79630  | -0.67719 |
| C | 0.90220  | 4.25350  | 2.66926  |
| H | 0.22700  | 4.38937  | 3.52179  |
| C | 1.40567  | -5.35156 | -1.81089 |
| H | 1.01411  | -6.35050 | -2.02859 |
| C | 4.32055  | -0.45369 | 2.86519  |
| H | 3.69070  | -0.23260 | 3.74370  |
| H | 5.32311  | -0.73996 | 3.23136  |
| H | 3.89169  | -1.33096 | 2.35533  |
| C | -1.35363 | 5.40691  | -1.69827 |
| H | -0.96626 | 6.41574  | -1.87392 |
| C | -4.51545 | 0.38905  | 2.73403  |
| H | -4.02517 | 0.11965  | 3.68492  |
| H | -5.53764 | 0.73888  | 2.96579  |
| H | -3.96100 | 1.23707  | 2.30020  |
| C | -5.33085 | -2.58798 | 2.50436  |
| H | -6.22066 | -2.96615 | 1.97184  |
| H | -5.67021 | -2.26486 | 3.50413  |
| H | -4.64013 | -3.43553 | 2.64121  |
| C | 4.24435  | 0.64806  | -2.72571 |
| H | 3.67214  | 0.41132  | -3.63893 |
| H | 5.21533  | 1.07607  | -3.03435 |
| H | 3.69510  | 1.42971  | -2.17651 |
| C | -3.57559 | -3.76115 | -0.83084 |
| H | -3.83379 | -2.69125 | -0.90811 |
| C | 5.21886  | -2.26924 | -2.83197 |
| H | 4.58115  | -3.16454 | -2.91155 |
| H | 6.21458  | -2.59672 | -2.48624 |
| H | 5.35117  | -1.86052 | -3.84901 |
| C | -2.44668 | -2.27529 | 4.66940  |
| H | -3.47851 | -2.33716 | 4.29522  |
| H | -2.40793 | -1.48870 | 5.44422  |
| H | -2.20797 | -3.23890 | 5.15524  |
| C | 1.07375  | 1.83975  | 3.38199  |
| H | 1.41045  | 0.90256  | 2.90265  |
| C | -4.19827 | -0.47712 | -2.96501 |
| H | -3.60585 | -0.19413 | -3.85165 |
| H | -5.17394 | -0.85871 | -3.31646 |
| H | -3.67501 | -1.30928 | -2.46564 |
| C | -0.02539 | -1.86382 | 4.15974  |
| H | 0.32284  | -2.82463 | 4.57890  |
| H | -0.03863 | -1.14477 | 4.99697  |
| H | 0.73072  | -1.51311 | 3.44058  |
| C | 1.97454  | -2.01064 | -4.65471 |
| H | 3.06025  | -2.04578 | -4.47675 |
| H | 1.76558  | -1.17386 | -5.34526 |
| H | 1.68816  | -2.94713 | -5.16697 |
| C | 0.40207  | 1.87303  | -3.62776 |
| H | 0.81174  | 2.81039  | -4.04454 |
| H | 0.62853  | 1.07335  | -4.35368 |
| H | 0.95104  | 1.63969  | -2.69741 |
| C | -0.32446 | -1.74801 | -3.64729 |
| H | -0.71097 | -2.66596 | -4.12485 |
| H | -0.52575 | -0.91688 | -4.34427 |
| H | -0.91300 | -1.56029 | -2.73100 |
| C | -5.13278 | 2.46465  | -2.84840 |
| H | -5.87430 | 3.04754  | -2.27581 |
| H | -5.65373 | 2.06012  | -3.73428 |
| H | -4.36144 | 3.16763  | -3.20081 |
| C | -0.43768 | 1.73294  | 3.65881  |
| H | -0.84299 | 2.64674  | 4.12849  |
| H | -0.64664 | 0.89857  | 4.34800  |
| H | -1.00320 | 1.54365  | 2.72832  |
| C | 5.13223  | 2.50332  | 2.79563  |
| H | 4.34492  | 3.13169  | 3.24131  |
| H | 5.79317  | 3.16576  | 2.21170  |
| H | 5.73859  | 2.08493  | 3.61838  |
| C | 3.07754  | 4.23536  | -1.98025 |
| H | 2.20982  | 3.60040  | -2.22748 |
| H | 3.81235  | 4.12055  | -2.79624 |
| H | 2.73883  | 5.28763  | -1.98344 |
| C | 5.24279  | -4.37920 | 0.18586  |
| H | 5.13999  | -5.46190 | -0.01031 |
| H | 6.01110  | -4.24999 | 0.96861  |
| H | 5.60910  | -3.90540 | -0.73696 |
| C | -4.88107 | -4.55910 | -0.60552 |

|    |          |          |          |
|----|----------|----------|----------|
| H  | -4.67596 | -5.64293 | -0.53489 |
| H  | -5.57763 | -4.40505 | -1.44857 |
| H  | -5.39053 | -4.25447 | 0.32127  |
| C  | 3.46772  | -4.44936 | 1.97123  |
| H  | 2.50197  | -4.07217 | 2.34831  |
| H  | 4.22533  | -4.26085 | 2.75141  |
| H  | 3.38022  | -5.54540 | 1.86266  |
| C  | -2.92289 | -4.20200 | -2.15781 |
| H  | -1.99740 | -3.64098 | -2.36971 |
| H  | -3.61327 | -4.03053 | -3.00210 |
| H  | -2.67180 | -5.27839 | -2.15210 |
| C  | -3.18811 | 4.08999  | 2.10816  |
| H  | -2.27919 | 3.51393  | 2.35184  |
| H  | -3.92291 | 3.90173  | 2.91048  |
| H  | -2.92748 | 5.16363  | 2.14398  |
| C  | -1.85275 | 2.18438  | -4.71448 |
| H  | -2.94604 | 2.19710  | -4.58568 |
| H  | -1.60285 | 1.38175  | -5.43150 |
| H  | -1.55717 | 3.14556  | -5.17300 |
| C  | 1.83774  | 1.99969  | 4.71853  |
| H  | 2.92805  | 2.03078  | 4.56731  |
| H  | 1.61026  | 1.15824  | 5.39701  |
| H  | 1.54350  | 2.93368  | 5.23088  |
| C  | 4.95213  | 4.72424  | -0.35957 |
| H  | 4.69387  | 5.79859  | -0.33832 |
| H  | 5.69954  | 4.57908  | -1.15933 |
| H  | 5.42699  | 4.47744  | 0.60284  |
| C  | -5.07219 | 4.48421  | 0.47027  |
| H  | -4.88320 | 5.57313  | 0.45773  |
| H  | -5.81434 | 4.28373  | 1.26302  |
| H  | -5.52209 | 4.21335  | -0.49771 |
| Mg | -1.69537 | 0.00157  | -0.00847 |
| H  | 1.98852  | -2.14850 | 1.35259  |
| H  | 1.33350  | -1.91561 | 1.65349  |

### III

SCF (BP86) Energy = -2584.87309567  
 Enthalpy 0K = -2583.331369  
 Enthalpy 298K = -2583.330424  
 Free Energy 298K = -2583.559487  
 Lowest Frequency = 22.7234 cm<sup>-1</sup>  
 Second Frequency = 24.0395 cm<sup>-1</sup>  
 SCF (BP86-D3BJ) Energy = -2585.38316163  
 SCF (C6H6) Energy = -2584.89625844  
 SCF (BS2) Energy = -4450.66818486

|    |          |          |          |
|----|----------|----------|----------|
| Si | 4.55735  | 0.99226  | 1.55275  |
| Si | 4.38868  | -1.12992 | -1.78903 |
| Si | -4.45546 | 1.02418  | -1.69999 |
| Si | -4.47649 | -0.95271 | 1.69700  |
| Mg | -1.68625 | -0.02411 | -0.04391 |
| Na | 0.03217  | 3.60552  | 0.00345  |
| Na | -0.06103 | -3.53862 | 0.06350  |
| N  | 2.91191  | 1.40823  | 0.99908  |
| N  | 2.83454  | -1.51504 | -1.00889 |
| N  | -2.90164 | -1.41182 | 0.99920  |
| N  | -2.88110 | 1.46682  | -0.99757 |
| C  | 2.44685  | 2.71217  | 1.25576  |
| C  | -2.37060 | 2.74611  | -1.26250 |
| C  | 1.39774  | -3.06303 | -2.34185 |
| C  | 2.75843  | 3.82494  | 0.37446  |
| C  | 2.31228  | -2.79982 | -1.24414 |
| C  | 1.62888  | 3.01780  | 2.42123  |
| C  | -2.41855 | -2.69540 | 1.31650  |
| C  | -1.44366 | 2.97804  | -2.35812 |
| C  | -2.72895 | 3.90655  | -0.46105 |
| C  | -2.79001 | -3.86788 | 0.54487  |
| C  | 1.12908  | 4.32345  | 2.61766  |
| H  | 0.51693  | 4.52836  | 3.50261  |
| C  | 1.38946  | 1.97333  | 3.51459  |
| H  | 1.46234  | 0.98500  | 3.02570  |
| C  | -5.85119 | -0.59217 | 0.40649  |
| H  | -5.89190 | -1.46335 | -0.27614 |
| H  | -6.79120 | -0.65259 | 0.99582  |
| C  | 2.65596  | -3.93037 | -0.40083 |
| C  | 2.24872  | 5.11742  | 0.63436  |
| H  | 2.51957  | 5.93898  | -0.03986 |

|   |          |          |          |
|---|----------|----------|----------|
| C | 0.86710  | -4.35757 | -2.53506 |
| H | 0.19317  | -4.53260 | -3.38171 |
| C | -5.84347 | 0.71899  | -0.40809 |
| H | -5.86417 | 1.59106  | 0.27344  |
| H | -6.78566 | 0.79228  | -0.99194 |
| C | 5.83868  | 0.61364  | 0.17068  |
| H | 5.81273  | 1.44772  | -0.55703 |
| H | 6.81311  | 0.72613  | 0.69266  |
| C | -1.10923 | 1.86760  | -3.35364 |
| H | -1.45401 | 0.92558  | -2.89167 |
| C | -1.51170 | -2.91189 | 2.43036  |
| C | 5.81150  | -0.74049 | -0.56581 |
| H | 5.85994  | -1.57416 | 0.16153  |
| H | 6.73179  | -0.84544 | -1.17946 |
| C | -0.92423 | 4.26954  | -2.59781 |
| H | -0.24977 | 4.41958  | -3.44871 |
| C | 1.42148  | 5.37904  | 1.73715  |
| H | 1.03604  | 6.38670  | 1.92404  |
| C | -2.25441 | -5.13593 | 0.86042  |
| H | -2.56069 | -6.00308 | 0.26283  |
| C | -3.77070 | 3.81240  | 0.65409  |
| H | -3.94454 | 2.73376  | 0.81585  |
| C | 2.09339  | -5.20373 | -0.63882 |
| H | 2.38349  | -6.03987 | 0.00904  |
| C | -1.36169 | -5.32023 | 1.92759  |
| H | -0.96576 | -6.31332 | 2.16334  |
| C | -2.17822 | 5.17585  | -0.74730 |
| H | -2.48484 | 6.03495  | -0.13877 |
| C | 3.66894  | -3.79383 | 0.73403  |
| H | 3.96536  | -2.73155 | 0.74470  |
| C | 1.05253  | -1.98011 | -3.36425 |
| H | 1.41367  | -1.02839 | -2.93615 |
| C | -3.79044 | -3.78318 | -0.60719 |
| H | -4.09390 | -2.72481 | -0.66942 |
| C | -1.00952 | -4.20364 | 2.70247  |
| H | -0.34009 | -4.34237 | 3.55915  |
| C | -1.27283 | 5.37321  | -1.80231 |
| H | -0.86799 | 6.36791  | -2.01524 |
| C | -4.29622 | 0.57276  | 2.83721  |
| H | -3.73295 | 0.31149  | 3.74921  |
| H | -5.28722 | 0.95032  | 3.14752  |
| H | -3.76511 | 1.40082  | 2.34084  |
| C | 1.19616  | -5.43287 | -1.69400 |
| H | 0.77952  | -6.42990 | -1.87007 |
| C | 4.48680  | -0.53592 | 2.69868  |
| H | 4.01224  | -0.28886 | 3.66273  |
| H | 5.50029  | -0.92428 | 2.90611  |
| H | 3.90433  | -1.35068 | 2.23912  |
| C | 5.38328  | 2.43285  | 2.53373  |
| H | 6.26575  | 2.81151  | 1.98955  |
| H | 5.74312  | 2.07517  | 3.51448  |
| H | 4.71113  | 3.28683  | 2.71445  |
| C | -4.26616 | -0.55757 | -2.75541 |
| H | -3.66981 | -0.34899 | -3.66006 |
| H | -5.25034 | -0.94304 | -3.07792 |
| H | -3.76087 | -1.36168 | -2.19599 |
| C | 3.69019  | 3.65567  | -0.82508 |
| H | 3.89864  | 2.57475  | -0.89756 |
| C | -5.13795 | 2.39767  | -2.86536 |
| H | -4.48153 | 3.28140  | -2.91927 |
| H | -6.13388 | 2.74000  | -2.53473 |
| H | -5.25752 | 2.00612  | -3.89065 |
| C | 2.50282  | 2.05742  | 4.58869  |
| H | 3.50643  | 1.93802  | 4.15951  |
| H | 2.35963  | 1.27308  | 5.35368  |
| H | 2.46964  | 3.03699  | 5.09929  |
| C | -1.14467 | -1.77963 | 3.39071  |
| H | -1.46687 | -0.84160 | 2.90379  |
| C | 4.19637  | 0.36348  | -2.96873 |
| H | 3.59479  | 0.09078  | -3.85231 |
| H | 5.18168  | 0.71525  | -3.32444 |
| H | 3.69728  | 1.21378  | -2.47514 |
| C | 0.02974  | 2.08509  | 4.23599  |
| H | -0.03642 | 3.00388  | 4.84647  |
| H | -0.09055 | 1.23980  | 4.93532  |
| H | -0.82869 | 2.07282  | 3.54885  |
| C | -1.88902 | 2.06926  | -4.67546 |

|    |          |          |          |
|----|----------|----------|----------|
| H  | -2.97470 | 2.12973  | -4.50406 |
| H  | -1.69616 | 1.23288  | -5.37118 |
| H  | -1.57635 | 3.00224  | -5.17871 |
| C  | -0.46016 | -1.85356 | -3.62554 |
| H  | -0.89151 | -2.77863 | -4.04787 |
| H  | -0.66293 | -1.04558 | -4.34923 |
| H  | -1.00773 | -1.61050 | -2.69680 |
| C  | 0.39550  | 1.74184  | -3.65243 |
| H  | 0.80904  | 2.65441  | -4.11754 |
| H  | 0.58228  | 0.91241  | -4.35559 |
| H  | 0.97100  | 1.53093  | -2.73287 |
| C  | 5.05968  | -2.59949 | -2.82810 |
| H  | 5.77624  | -3.20222 | -2.24435 |
| H  | 5.60300  | -2.21467 | -3.70928 |
| H  | 4.27122  | -3.27999 | -3.18659 |
| C  | 0.36714  | -1.68960 | 3.67211  |
| H  | 0.75845  | -2.60183 | 4.15668  |
| H  | 0.58412  | -0.84774 | 4.35062  |
| H  | 0.93936  | -1.52165 | 2.74145  |
| C  | -5.21540 | -2.35594 | 2.77883  |
| H  | -4.44948 | -2.99028 | 3.25258  |
| H  | -5.87312 | -3.01587 | 2.18853  |
| H  | -5.83398 | -1.91482 | 3.58038  |
| C  | -3.16231 | -4.18624 | -1.95903 |
| H  | -2.28504 | -3.56464 | -2.20685 |
| H  | -3.89193 | -4.06721 | -2.77909 |
| H  | -2.83763 | -5.24292 | -1.95348 |
| C  | -5.11159 | 4.44966  | 0.21658  |
| H  | -4.99012 | 5.53401  | 0.04081  |
| H  | -5.87743 | 4.31948  | 1.00164  |
| H  | -5.49301 | 4.00129  | -0.71304 |
| C  | 5.03095  | 4.39494  | -0.60834 |
| H  | 4.87525  | 5.48752  | -0.54739 |
| H  | 5.71911  | 4.20190  | -1.45025 |
| H  | 5.52673  | 4.07630  | 0.32113  |
| C  | -3.32006 | 4.45282  | 1.98669  |
| H  | -2.35896 | 4.04877  | 2.35115  |
| H  | -4.07387 | 4.26749  | 2.77120  |
| H  | -3.20628 | 5.54824  | 1.89646  |
| C  | 3.05413  | 4.11862  | -2.15296 |
| H  | 2.10193  | 3.60122  | -2.35835 |
| H  | 3.73199  | 3.90840  | -2.99865 |
| H  | 2.85511  | 5.20582  | -2.15390 |
| C  | 3.06697  | -4.14564 | 2.11144  |
| H  | 2.18861  | -3.52094 | 2.34857  |
| H  | 3.81001  | -3.98647 | 2.91241  |
| H  | 2.75133  | -5.20406 | 2.15764  |
| C  | 1.78913  | -2.22253 | -4.70389 |
| H  | 2.88124  | -2.26605 | -4.57190 |
| H  | 1.56395  | -1.41270 | -5.42103 |
| H  | 1.46827  | -3.17472 | -5.16416 |
| C  | -1.91372 | -1.91940 | 4.72677  |
| H  | -3.00398 | -1.93905 | 4.57326  |
| H  | -1.67819 | -1.07509 | 5.39902  |
| H  | -1.63173 | -2.85240 | 5.24771  |
| C  | -5.05220 | -4.63643 | -0.34450 |
| H  | -4.81129 | -5.71468 | -0.31711 |
| H  | -5.79413 | -4.48330 | -1.14785 |
| H  | -5.52675 | -4.37750 | 0.61494  |
| C  | 4.93295  | -4.64657 | 0.48048  |
| H  | 4.69752  | -5.72644 | 0.48685  |
| H  | 5.68483  | -4.46536 | 1.26865  |
| H  | 5.39212  | -4.41176 | -0.49271 |
| Mg | 1.68312  | -0.04029 | 0.00450  |
| H  | -1.71415 | 2.23918  | 1.50513  |
| H  | -1.09079 | 1.80384  | 1.45091  |

## References

1. H.-Y. Liu, R. J. Schwamm, S. E. Neale, M. S. Hill, C. L. McMullin and M. F. Mahon M., *J. Am. Chem. Soc.*, 2021, **143**, 17851–17856.
2. O. V. Dolomanov, L. J. Bourhis, R. J. Gildea, J. A. K. Howard and H. Puschmann, *H. J. Appl. Cryst.*, 2009, **42**, 339-341.
3. G. M. Sheldrick, *Acta Cryst.*, 2015, **A71**, 3-8.
4. G. M. Sheldrick, *Acta Cryst.*, 2015, **C71**, 3-8.
5. Gaussian 16, Revision C.01, M. J. Frisch, G. W. Trucks, H. B. Schlegel, G. E. Scuseria, M. A. Robb, J. R. Cheeseman, G. Scalmani, V. Barone, G. A. Petersson, H. Nakatsuji, X. Li, M. Caricato, A. V. Marenich, J. Bloino, B. G. Janesko, R. Gomperts, B. Mennucci, H. P. Hratchian, J. V. Ortiz, A. F. Izmaylov, J. L. Sonnenberg, D. Williams-Young, F. Ding, F. Lipparini, F. Egidi, J. Goings, B. Peng, A. Petrone, T. Henderson, D. Ranasinghe, V. G. Zakrzewski, J. Gao, N. Rega, G. Zheng, W. Liang, M. Hada, M. Ehara, K. Toyota, R. Fukuda, J. Hasegawa, M. Ishida, T. Nakajima, Y. Honda, O. Kitao, H. Nakai, T. Vreven, K. Throssell, J. A. Montgomery, Jr., J. E. Peralta, F. Ogliaro, M. J. Bearpark, J. J. Heyd, E. N. Brothers, K. N. Kudin, V. N. Staroverov, T. A. Keith, R. Kobayashi, J. Normand, K. Raghavachari, A. P. Rendell, J. C. Burant, S. S. Iyengar, J. Tomasi, M. Cossi, J. M. Millam, M. Klene, C. Adamo, R. Cammi, J. W. Ochterski, R. L. Martin, K. Morokuma, O. Farkas, J. B. Foresman, and D. J. Fox, Gaussian, Inc., Wallingford CT, 2016.
6. A. D. Becke, *Physical Review A* 1988, **38**, 3098-3100.
7. J. P. Perdew, *Physical Review B* 1986, **33**, 8822-8824.
8. D. Andrae, U. Häußermann, M. Dolg, H. Stoll and H Preuß, H., *Theoretica chimica acta* 1990, **77**, 123-141.
9. P. C. Hariharan and J. A. Pople, *Theoretica chimica acta* 1973, **28**, 213-222.
10. W. J. Hehre, R. Ditchfield and J. A. Pople, *The Journal of Chemical Physics* 1972, **56**, 2257-2261.
11. NBO 7.0, E. D. Glendening, J. K. Badenhoop, A. E. Reed, J. E. Carpenter, J. A. Bohmann, C. M. Morales, P. Karafiloglou, C. R. Landis, and F. Weinhold, Theoretical Chemistry Institute, University of Wisconsin, Madison, USA, 2003.
